# Supplementary material for: MicroRNA-552 enhances metastatic capacity of colorectal cancer cells by targeting a disintegrin and metalloprotease 28
Source: PubMed Central journal article supplement (PMC5342546; doi:10.18632/oncotarget.12169), 2016-09-21
Supplement: oncotarget-07-70194-s001.pdf [file oncotarget-07-70194-s001.pdf]

## **MicroRNA-552 enhances metastatic capacity of colorectal cancer cells by targeting a disintegrin and metalloprotease 28**

### **Supplementary Materials**

**Supplementary Table S1: Potential targets of miR-552 predicted TargetScan online software.**  
See Supplementary\_Table\_S1
